# Supplementary material
Source: PubMed Central journal article supplement (PMC3791257)
Supplement: mmc1.pdf [file mmc1.pdf]

The American Journal of Human Genetics, Volume 93

**Supplemental Data**

**Reliable Identification of Genomic Variants  
from RNA-Seq Data**

Robert Piskol, Gokul Ramaswami, and Jin Billy Li

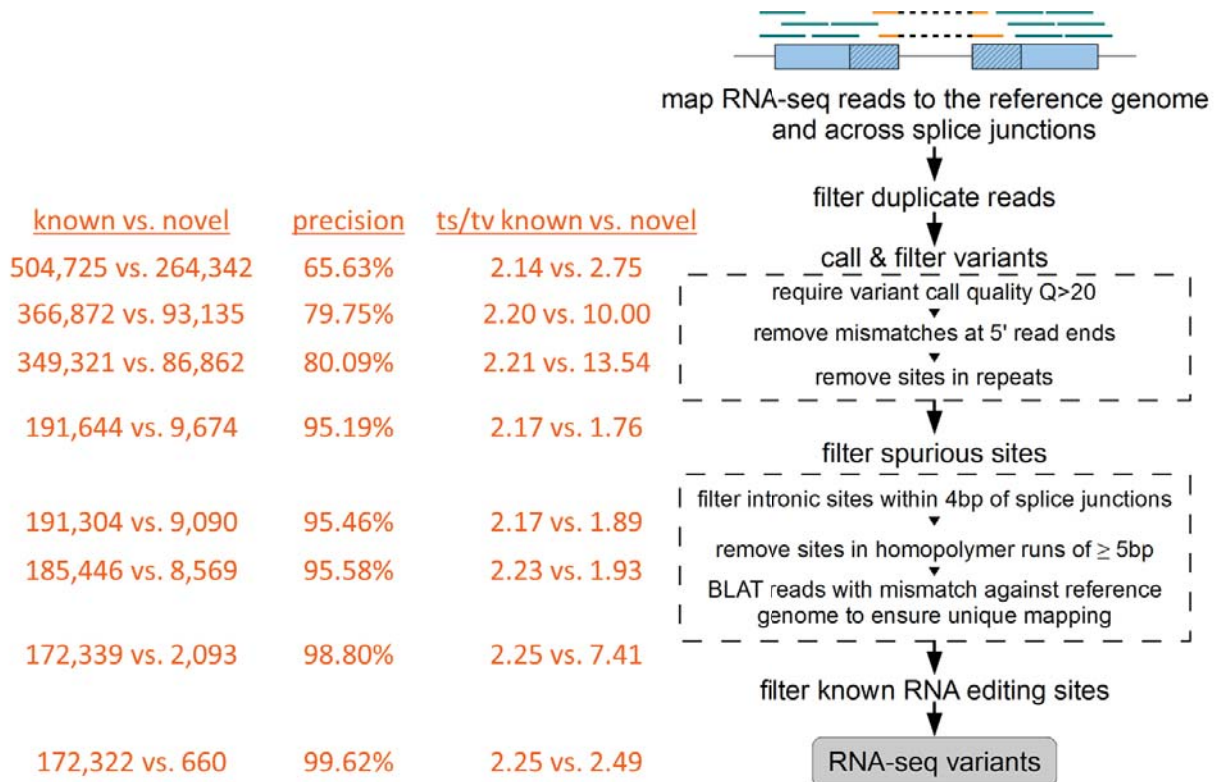

**Figure S1. Outline of the filtering procedure applied in our computational pipeline.** Orange numbers describe the number of known/novel GM12878 sites that remained after each filtering step, as well as the precision and the ts/tv ratios after each filtering step.

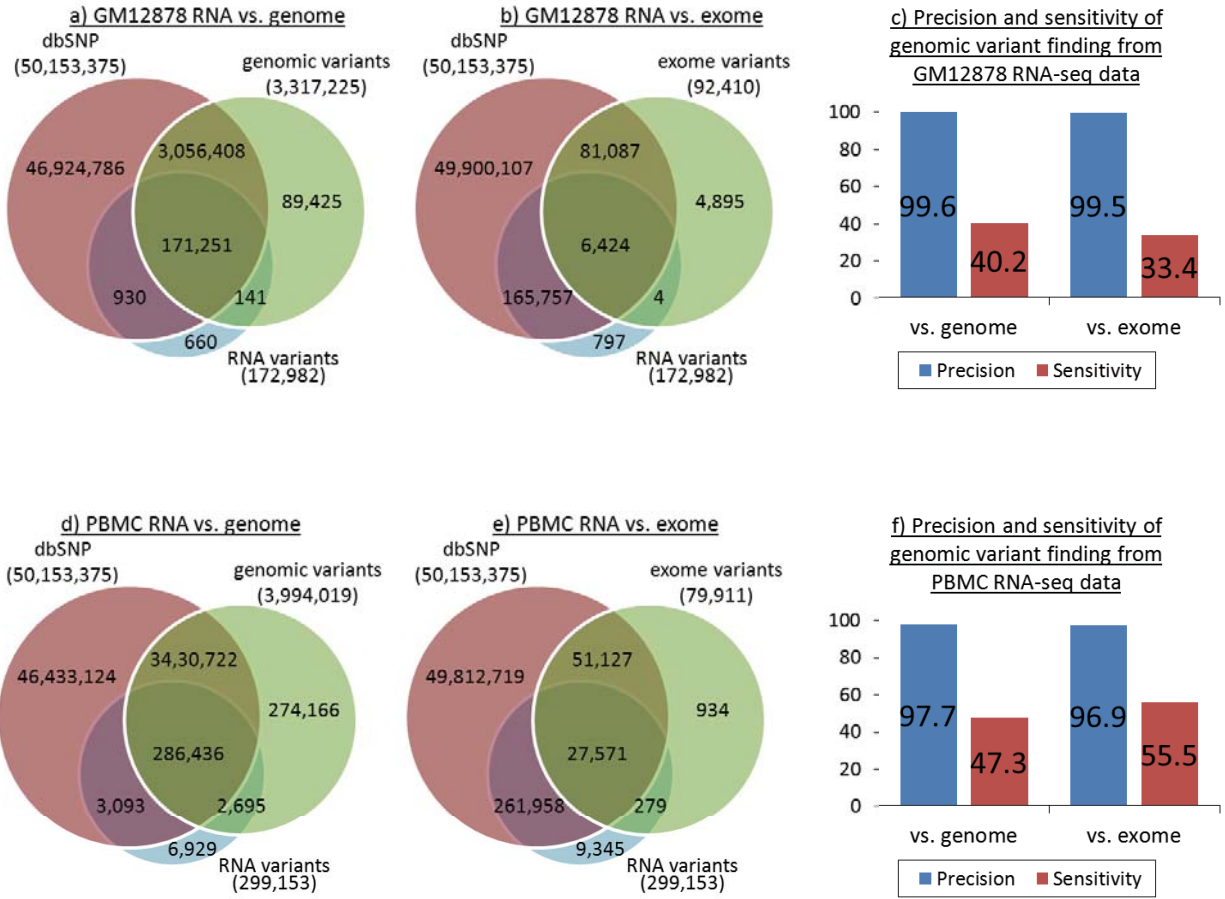

**Figure S2. Comparison of SNPs identified via RNA-seq and genome sequencing of GM12878/PBMCs or present in dbSNP. (a,b) Overlap of RNA-seq and genome/exome variants of GM12878. (d,e) Comparison of RNA-seq variants and genome/exome variants in PBMCs. (c,f) Precision and sensitivity of RNA variant finding in GM12878 and PBMCs. Precision was calculated as the percentage of all RNA-seq variants confirmed by WGS/WES or present in dbSNP. Sensitivity describes the percentage of all exonic variants found through WGS/WES of GM12878/PBMCs and recovered with RNA-seq data of the same data set. (Note: circles are schematics and therefore not to scale).**

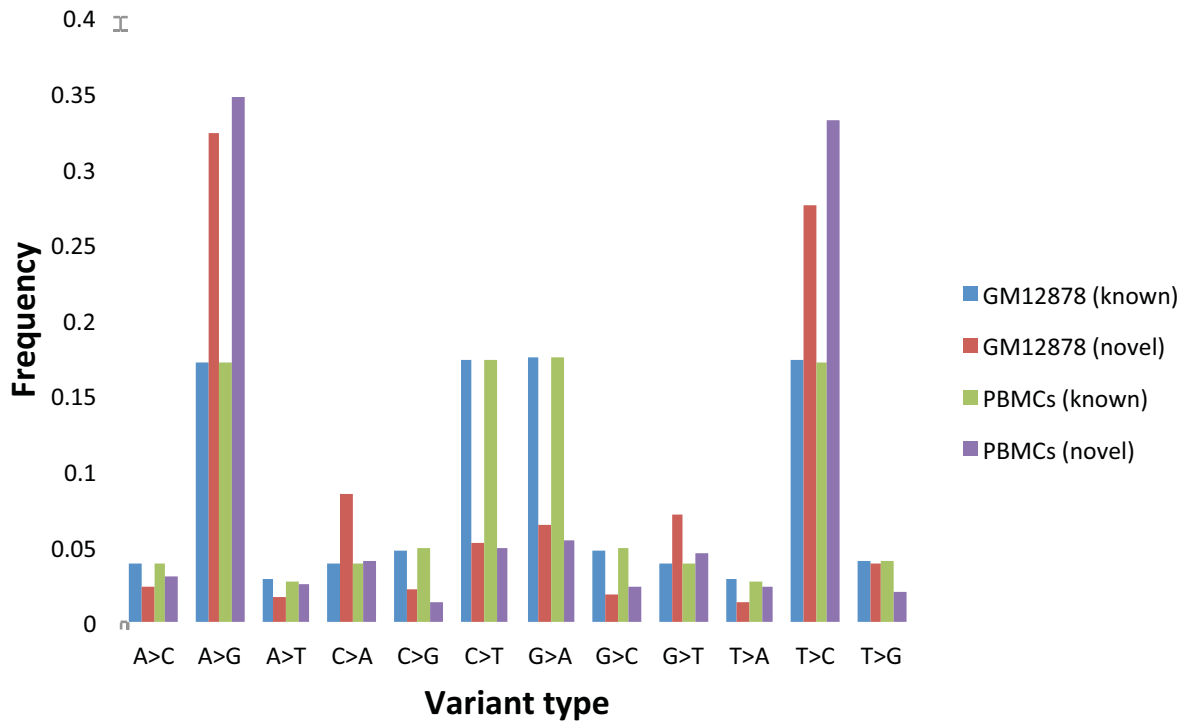

**Figure S3. Types of known and novel variants in the GM12878 and PBMC datasets.**

(a)

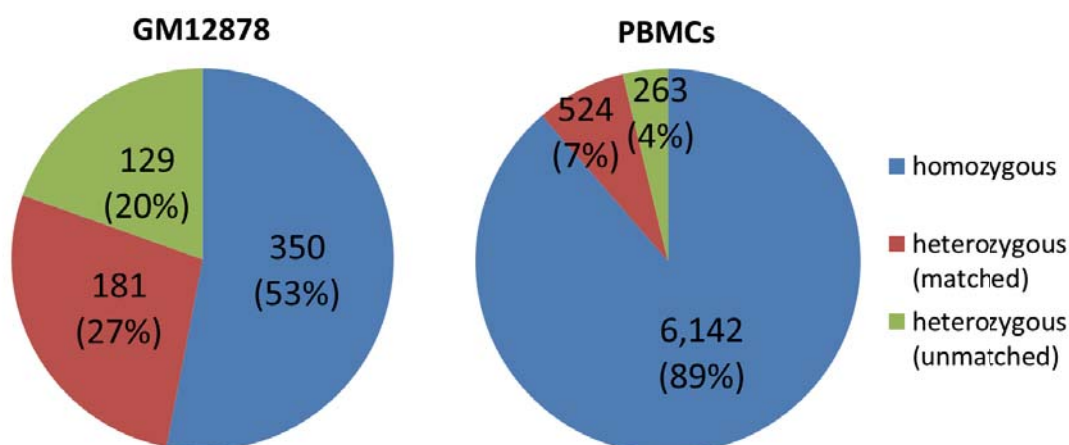

(b)

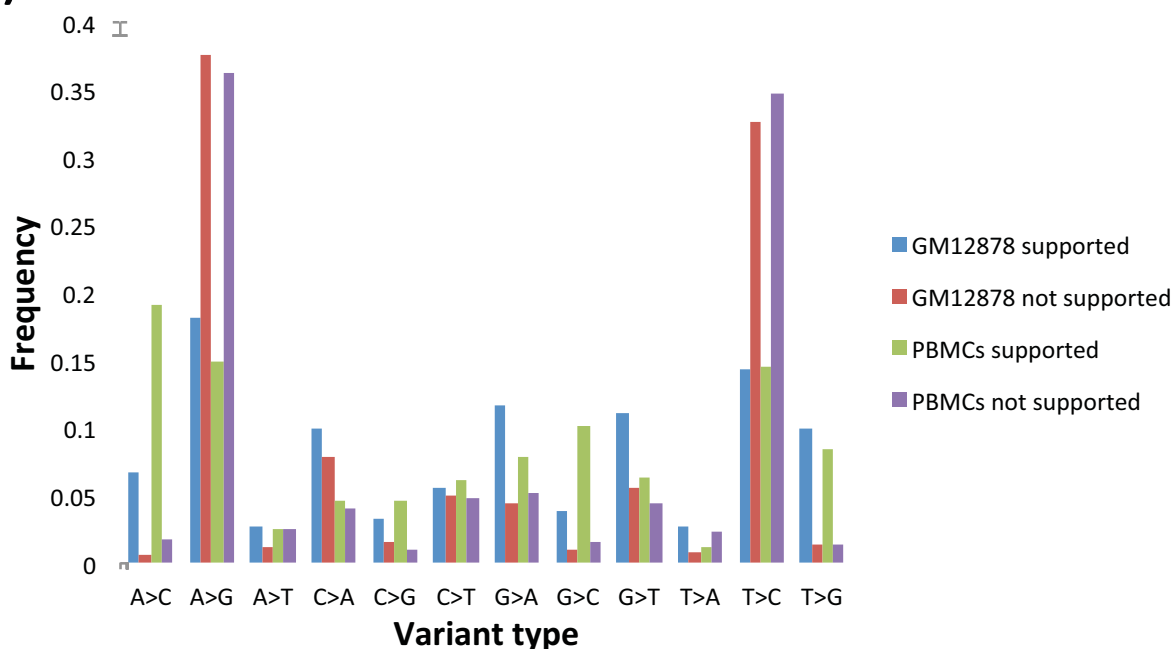

**Figure S4. Novel variants in GM12878 and PBMCs.** (a) Fractions of novel RNA-seq variants with evidence for support from WGS (homozygous: no variation in WGS; heterozygous matched: variation in WGS matches RNA-seq variant; heterozygous unmatched: variation in WGS does not match RNA-seq variant), (b) types of WGS-supported (heterozygous matched) and WGS-unsupported (homozygous, heterozygous unmatched) novel variants in (a).

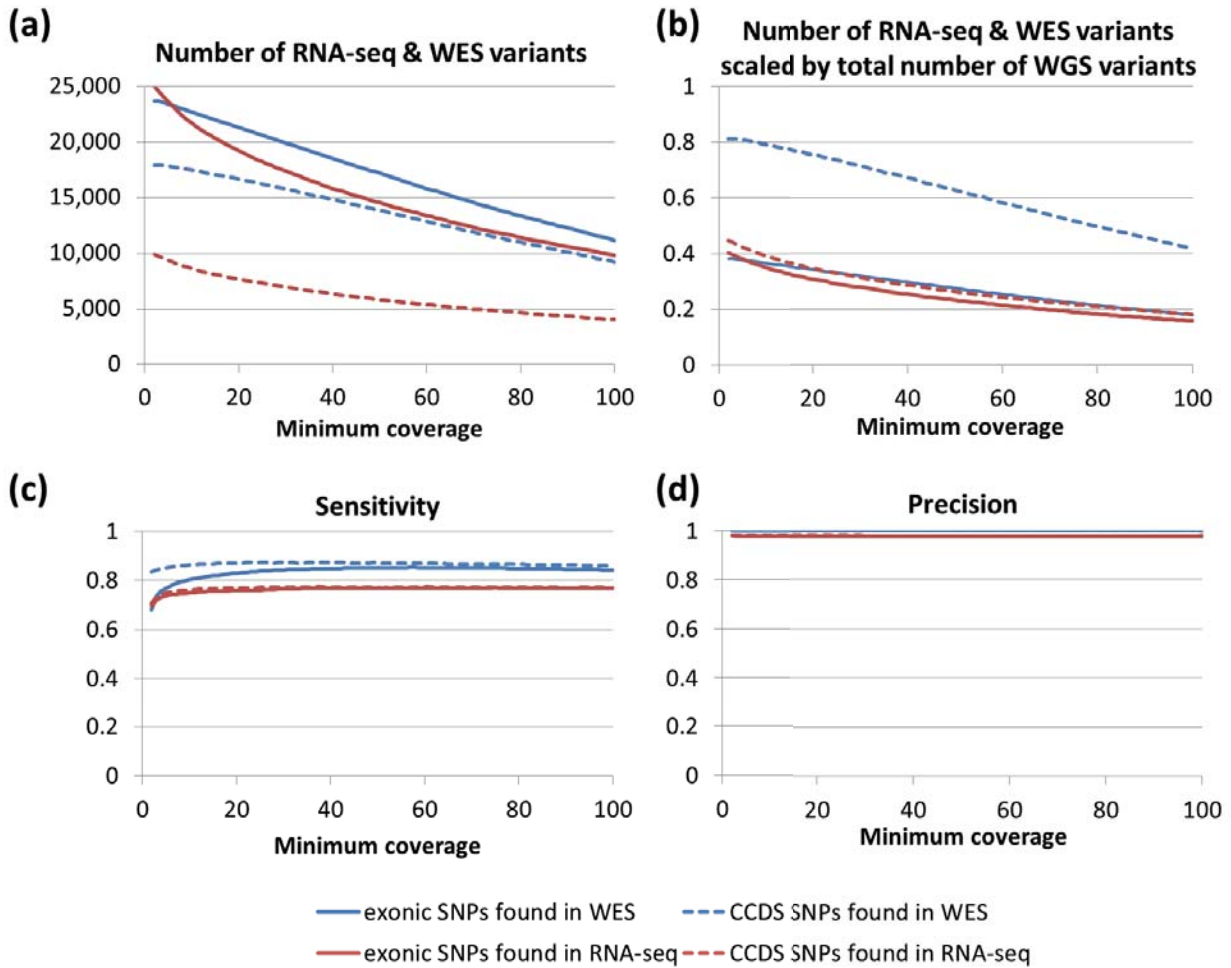

**Figure S5. Comparison of sensitivity and precision between variant calling from RNA-seq and exome-seq experiments.** We identified all genomic SNPs in (1) exonic regions (coding exons & UTRs) and (2) consensus CDS (CCDS) regions. Subsequently, RNA-seq and WES variants that were found in these regions served to determine (a,b) the number and scaled number of RNA-seq & WES variants, (c) the sensitivity and (d) the precision depending on the RNA-seq and WES coverage. Sensitivity was determined as the number of RNA-seq/WES variants that had the same type as the genomic variant, divided by the total number of genomic variants with a certain minimum coverage. Precision was calculated as the number of correctly identified genomic variants divided by the total number of detected RNA-seq/WES variants (variants with matching type as well as variants that do not match the WGS type or were not found in WGS).

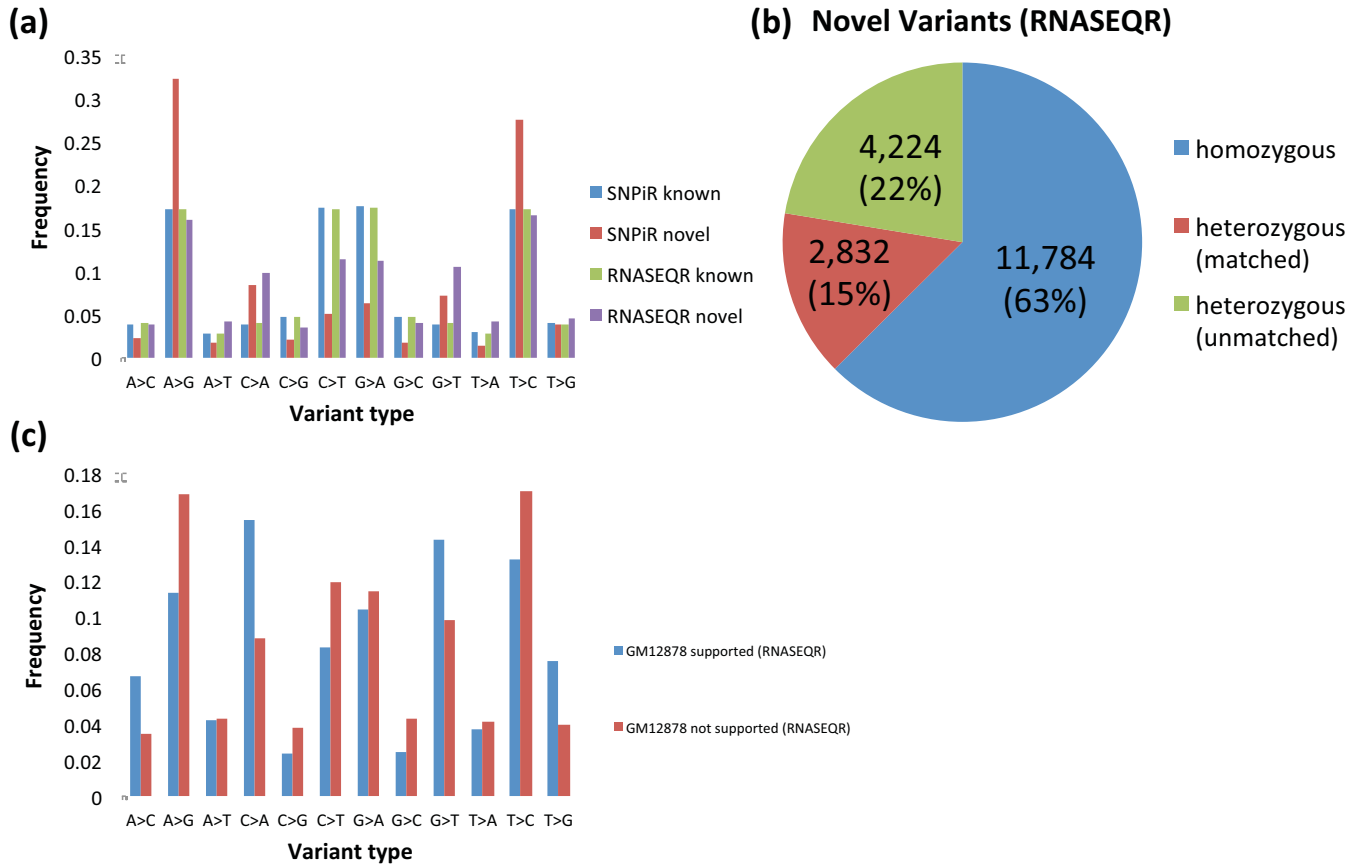

**Figure S6. Comparison of SNPiR and RNASEQR variants.** (a) Mutational Spectrum for novel and known variants found by our method (SNPiR) and RNASEQR in the GM12878 data set (SNPiR variants are taken from Supplementary Figure 3), (b) fractions of novel RNASEQR variants with evidence for support from WGS (homozygous: no variation in WGS; heterozygous matched: variation in WGS matches RNA-seq variant; heterozygous unmatched: variation in WGS does not match RNA-seq variant), and (c) types of WGS-supported (heterozygous matched) and WGS-unsupported (homozygous, heterozygous unmatched) novel variants in (b).

## Figure S7. Sequence mapping details

(a) Position chr10:26,936,469:

Example for variation in RNASEQR mapping that is caused by not-uniquely mapped reads.

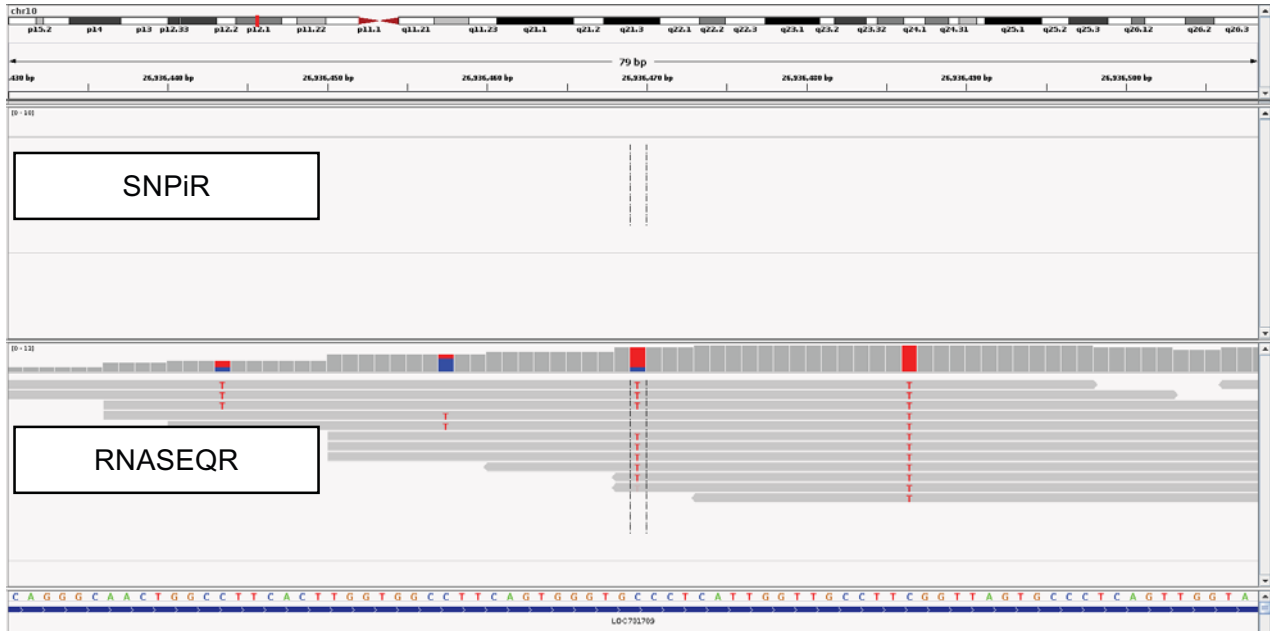

Comparison between the mapping location assigned by RNASEQR (see above) and the original location of a read in a different region of the genome. Mismatches in the RNASEQR mapping correspond exactly to reference nucleotides in the correct location:

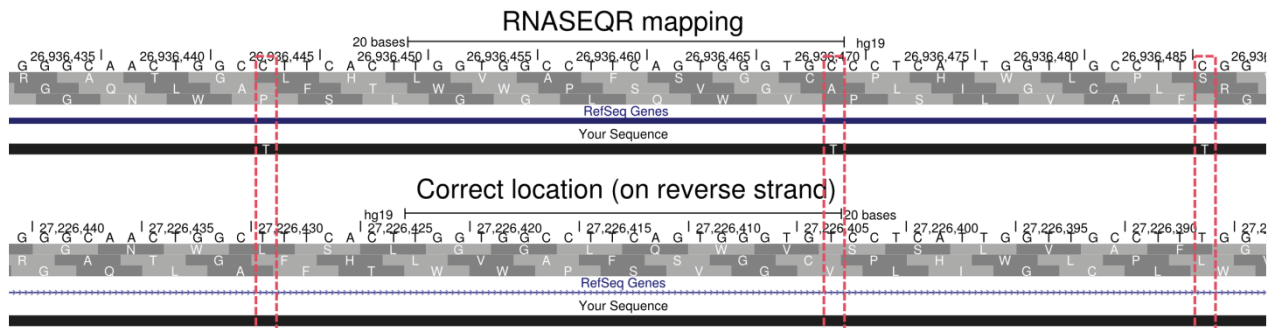



**(b) Position chr20:62701176:**

Example for variation in RNAseqR mapping that is caused by incorrectly spliced reads. The two sides of a splicing junction are shown.

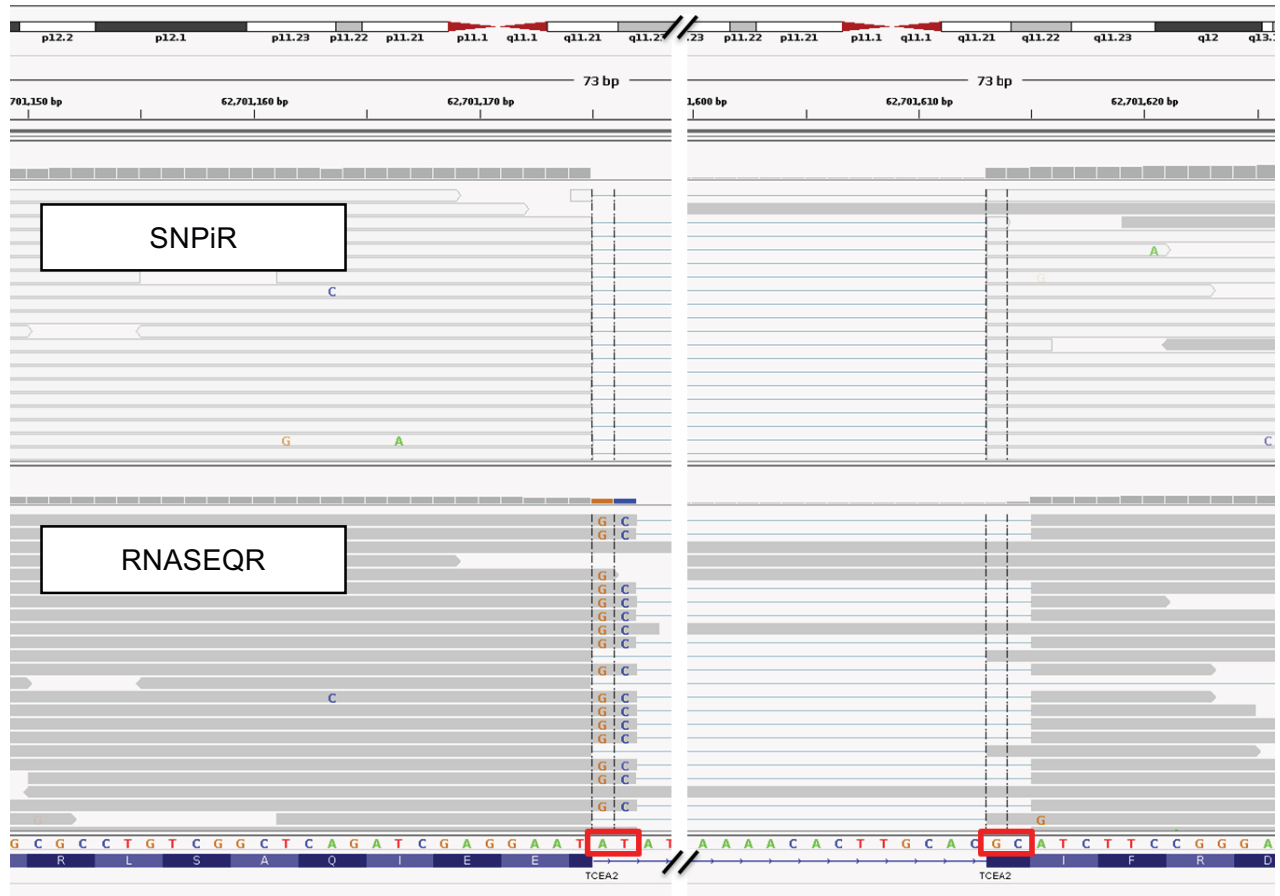

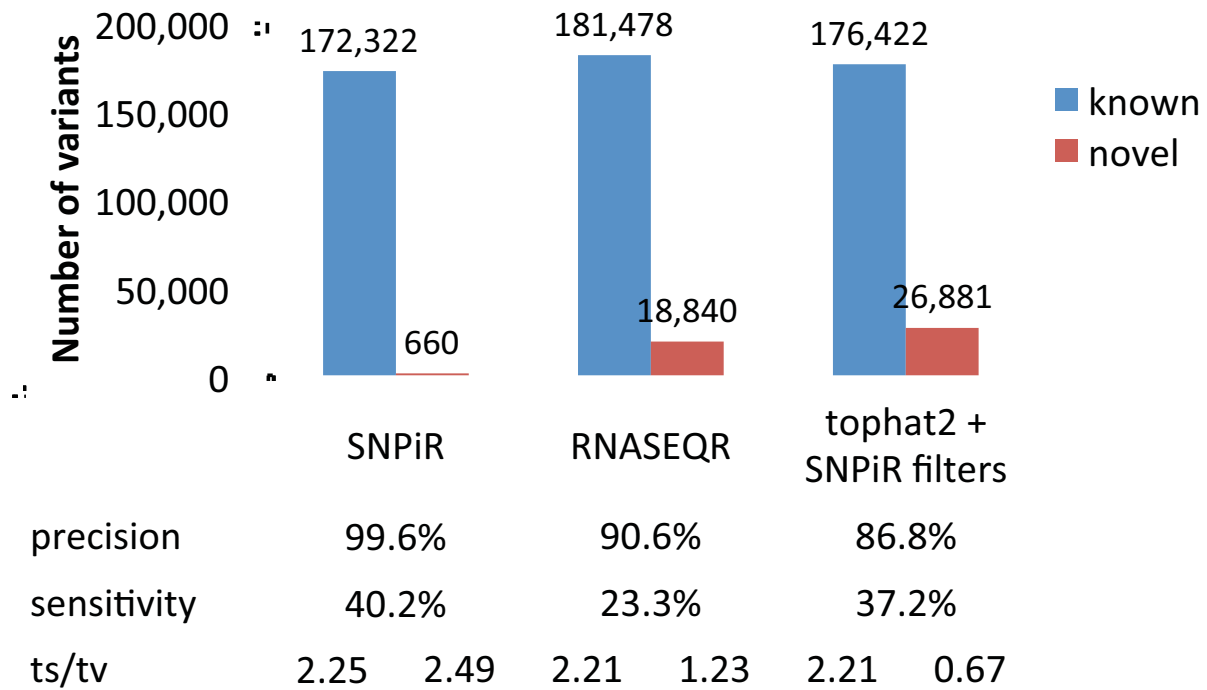

**Figure S8. Comparison of total number of RNA-seq variants, precision and sensitivity between SNPiR, RNASEQR and tophat2.** For tophat2 all variants were filtered using the SNPiR procedure.

**Table S1. Summary of the data used in this work**

|                                                 | GM12878 |           |          | PBMCs   |           |        |
|-------------------------------------------------|---------|-----------|----------|---------|-----------|--------|
|                                                 | RNA-seq | WGS       | WES      | RNA-seq | WGS       | WES    |
| Number of reads (million)                       | 499.4   | 3,218.0   | 103.1    | 3,232.0 | 1,233.9   | 124.2  |
| Number of filtered reads (million) <sup>1</sup> | 110.3   | 2.580     | 45.1     | 500.1   | 1,166.9   | 94.1   |
| Read length                                     | 76      | 36 – 76   | 36 – 101 | 101     | 100       | 101    |
| Number of variants                              | 172,982 | 3,317,225 | 92,410   | 299,153 | 3,944,019 | 79,911 |

<sup>1</sup> after removal of reads that cannot be uniquely mapped by BWA, that map to exactly the same location and have a mapping quality  $q < 10$

Number of paired end reads and total discovered nucleotide variants for RNA-seq, WGS and exome-seq (WES) of GM12878 and PBMCs. WES data is based on the Agilent SureSelect kit.

**Table S2. Evaluation of SNPiR on random subsamplings of the GM12878 RNA-seq data**

| Sample name  | sample size | All variants |        |       |           |            | Exonic variants |       |       |           |            |
|--------------|-------------|--------------|--------|-------|-----------|------------|-----------------|-------|-------|-----------|------------|
|              |             | all          | known  | novel | precision | SD (known) | all             | known | novel | precision | SD (known) |
| 5_1          | 5000000     | 9472         | 9312   | 160   | 0.9831    | 30.05      | 2064            | 2028  | 23    | 0.9826    | 8.33       |
| 5_2          | 5000000     | 9445         | 9310   | 135   | 0.9857    |            | 2068            | 2033  | 24    | 0.9831    |            |
| 5_3          | 5000000     | 9505         | 9373   | 132   | 0.9861    |            | 2052            | 2021  | 17    | 0.9849    |            |
| 10_1         | 10000000    | 17321        | 17072  | 249   | 0.9856    | 107.87     | 3244            | 3195  | 26    | 0.9849    | 24.66      |
| 10_2         | 10000000    | 17141        | 16910  | 231   | 0.9865    |            | 3249            | 3195  | 34    | 0.9834    |            |
| 10_3         | 10000000    | 17128        | 16896  | 232   | 0.9865    |            | 3204            | 3155  | 22    | 0.9847    |            |
| 20_1         | 20000000    | 33219        | 32777  | 442   | 0.9867    | 79.57      | 4894            | 4809  | 35    | 0.9826    | 5.57       |
| 20_2         | 20000000    | 33062        | 32635  | 427   | 0.9871    |            | 4883            | 4802  | 35    | 0.9834    |            |
| 20_3         | 20000000    | 33163        | 32754  | 409   | 0.9877    |            | 4890            | 4816  | 32    | 0.9849    |            |
| 50_1         | 50000000    | 62820        | 62015  | 805   | 0.9872    | 47.96      | 6530            | 6399  | 43    | 0.9799    | 6.08       |
| 50_2         | 50000000    | 62739        | 61935  | 804   | 0.9872    |            | 6529            | 6402  | 41    | 0.9805    |            |
| 50_3         | 50000000    | 62824        | 62027  | 797   | 0.9873    |            | 6519            | 6394  | 39    | 0.9809    |            |
| 100_1        | 100000000   | 97017        | 95846  | 1171  | 0.9880    | 160.13     | 7618            | 7470  | 43    | 0.9806    | 20.55      |
| 100_2        | 100000000   | 96709        | 95564  | 1145  | 0.9882    |            | 7621            | 7473  | 41    | 0.9806    |            |
| 100_3        | 100000000   | 96787        | 95636  | 1151  | 0.9881    |            | 7584            | 7435  | 47    | 0.9804    |            |
| complete set | 499900000   | 172982       | 172322 | 660   | 0.9962    |            | 9803            | 9774  | 29    | 0.9970    |            |

Known variants describe all sites that were confirmed through WGS or were present in dbSNP. Novel variants could not be identified in any of these two sources.

**Table S3. Comparison of SNPiR and RNASEQR mapping and variant calling results for GM12878 and PBMCs**

|                                    | GM12878 |         | PBMCs   |         |
|------------------------------------|---------|---------|---------|---------|
|                                    | SNPiR   | RNASEQR | SNPiR   | RNASEQR |
| Number of reads (million)          | 499.2   |         | 3,232.0 |         |
| Read length (base)                 | 76      |         | 101     |         |
| Number of filtered reads (million) | 110.3   | 176.8   | 1,166.9 | 1,400.9 |
| Total number of variants           | 172,982 | 200,318 | 299,153 | 315,945 |
| Number of known variants           | 172,322 | 181,478 | 292,224 | 275,013 |
| Number of novel variants           | 660     | 18,840  | 6,929   | 40,923  |
